# Supplementary material for: Conifers exhibit a characteristic inactivation of auxin to maintain tissue homeostasis
Source: bioRxiv or medRxiv preprint supplement (doi:10.1101/789420), 2019-10-01
Supplement: Supplementary file [file media-1.pdf]

**Supporting information for:**

**Conifers exhibit a characteristic inactivation of auxin to maintain tissue homeostasis**

Federica Brunoni, Silvio Collani, Rubén Casanova-Saéz, Jan Šimura, Michal Karady, Markus Schmid, Karin Ljung and Catherine Bellini

Email: [karin.ljung@slu.se](mailto:karin.ljung@slu.se) or [catherine.bellini@umu.se](mailto:catherine.bellini@umu.se) or [catherine.bellini@inra.fr](mailto:catherine.bellini@inra.fr)

**The following Supporting Information is available for this article:**

Table S1

Fig. S1 to S7

Table S1: Primers used in this work.

| Purpose         | Name            | Gene ID          | Primer sequence (5'→3')                                                                        |                                                                                              |                                                                    |
|-----------------|-----------------|------------------|------------------------------------------------------------------------------------------------|----------------------------------------------------------------------------------------------|--------------------------------------------------------------------|
|                 |                 |                  | Forward                                                                                        | Reverse                                                                                      |                                                                    |
| RT-qPCR         | PaGH3.16_q      | MA_10434772g0010 | GCTACCACCGAGCGTAACAAG                                                                          | CACTGAACCATAGCGTTGAAG                                                                        |                                                                    |
|                 | PaGH3.17_q      | MA_16777g0010    | CGGTCGAATCGATAACAAATCG                                                                         | CTGTGAAGCTCCTCGGGAAT                                                                         |                                                                    |
|                 | PaGH3.gII.1_q   | MA_100975g0010   | CACGAGGTGGTATAAGAGTCG                                                                          | GAACCCAGAAGCAAAGATGGC                                                                        |                                                                    |
|                 | PaGH3.gII.2_q   | MA_10432413g0010 | CACTGGATGAGAAAGAGCGAC                                                                          | GCGTCGATACTCAGCACAA                                                                          |                                                                    |
|                 | PaGH3.gII.3_q   | MA_580596g0010   | CTATCTATCGCCAAGGAAGAGC                                                                         | GGAGTTTAGCAGCTCAACGA                                                                         |                                                                    |
|                 | PaGH3.gII.4_q   | MA_66253g0010    | GACGATCTCAAGTCTGAG                                                                             | CGGGCATGAGAAGACTATACAG                                                                       |                                                                    |
|                 | PaGH3.gII.5_q   | MA_6467862g0010  | GGTCACTACGTCTATACTG                                                                            | CCCTCTACTGAGAGCATAATCC                                                                       |                                                                    |
|                 | PaGH3.gII.7_q   | MA_212507g0010   | CGTCGTATTGTAACGAGAGAC                                                                          | CCCTTGCAAGTCTTGCA                                                                            |                                                                    |
|                 | PaGH3.gII.8_q   | MA_10432413g0020 | CTGCTCATCCAGTTCCGAA                                                                            | GGAGTCTTTGCCCTCCGATT                                                                         |                                                                    |
|                 | PaGH3.gII.9_q   | MA_10330250g0010 | CGAGAATACGAGCTTGTCG                                                                            | CAGCTCTGCTTCATCCGTTT                                                                         |                                                                    |
|                 | PaGH3.gI.1_q    | MA_10429520g0010 | CATCTGCGTCATGAAGGCTT                                                                           | CGGTAACCTTCACGACATCACC                                                                       |                                                                    |
|                 | PaGH3.gI.2_q    | MA_376158g0010   | GACTGGAGACGAAACCAGAA                                                                           | CCAAGTCCACTTGCAATTGC                                                                         |                                                                    |
|                 | PaIF4A_q        | MA_50378g0010    | TTGGTCGGAGTGGACGATTTGG                                                                         | TGACGAGAGAATGCTGCAGGAC                                                                       |                                                                    |
|                 | Cloning         | PaGH3.16_clo     | MA_10434772g0010                                                                               | TCCCCTCTAGAAATAATTTTGATTTAACTTTAAGAAGGAGATATACCATGCATCACCATCACCATCACGCGATGGGAGAGAAAGCGAAAGC  | CTCGAGTGC GGCCG CAGCAAGCTTCTAGCTAGCTTATTATTACCTCACAAATTTAGCAACAAAC |
|                 |                 | PaGH3.17_clo     | MA_16777g0010                                                                                  | TCCCCTCTAGAAATAATTTTGATTTAACTTTAAGAAGGAGATATACCATGCATCACCATCACCATCACGCGATGGAGATGAATATTCGCTGC | CTCGAGTGC GGCCG CAGCAAGCTTCTAGCTAGCTTATTATTAATAAAGCTGAGAATTTGG     |
| PaGH3.gII.8_clo |                 | MA_10432413g0020 | TCCCCTCTAGAAATAATTTTGATTTAACTTTAAGAAGGAGATATACCATGCATCACCATCACCATCACGCGATGAGTTCTTCTG GAAACGAGG | CTCGAGTGC GGCCG CAGCAAGCTTCTAGCTAGCTTATTATTATGCCAAATTTCTGCATCCTGG                            |                                                                    |
| PaGH3.gII.9_clo |                 | MA_10330250g0010 | TCCCCTCTAGAAATAATTTTGATTTAACTTTAAGAAGGAGATATACCATGCATCACCATCACCATCACGCGATGAGTTCTGCTATGGGAAAC   | CTCGAGTGC GGCCG CAGCAAGCTTCTAGCTAGCTTATTATTACGCCAATTTCTGCATCC                                |                                                                    |
| 5'-RACE         | PaGH3.gII.9_gsp | MA_10330250g0010 |                                                                                                | TGAGCCATTGCACCAGTGACGATGACAT                                                                 |                                                                    |

**Fig. S1**

**Full-length coding sequence of *PaGH3.16*, *PaGH3.17*, *PaGH3.gII.8* and *PaGH3.gII.9*.**

>PaGH3.16\_CDS

ATGCCTCAGGCAAAGAGAGAAGAGAGTATGGAGTCCGTCCAAGAGTGTATTAGCATTGCTACCACCGAGC  
GTAACAAGGAAGCTCTGGATTTTCATCGAGAATGTCACCGTTCATGCTGATGCAGTGCAAGAGCGAGTTCT  
GTTGGAAATTTTAACTAGAAATGCTCATAACAGAAATATCTTCAACGCTATGGGTTCAGTGGTTCGCACTGAT  
AGAGAGTCATTCAAGGAATGTTTTCTGTGATTACTTACGAAGATCTGCAGCCTGAGATTCTTCGCATAG  
CTAACGGAGACACATCTCCCATTCTTTCTGCTCACCCCATCTCTGAATTTCTCACAAGCTCTGGAACATC  
GGCTGGAGAGCGCAAGATTATGCCACTATTCACGAAGAATTAGAGCGGAGAACGCTTCTTTACAGCCTG  
CTTATGCCTGTGATGAACCAATACATGGAAGGGCTGGACAAGGGAAAAGGCATGTACTTCCTCTTCATCA  
AATCTGAGACCAGGACTCCCGGTGGGTTGCTCGCTCGTCTGTCCCTCACGAGCTACTACAAGAGTCAGCA  
CTTCAGAGAGCGGCCCTTACGACCCCTACAATGTATACACCAGCCCCATAGAGGCGATACTAAGTGCAGAC  
TCATATCAAAGCATGTACTGCCAGCTTCTCTGCGGTCTTGCGCAGAACCACGAGGTGCTCAGAGTGGGAG  
CCGTGTTTCGCGTCCGGGCTTCTGAGAGCAATACGTTTCTGGAGGAACATTGGAAGTTCGCTGTGTCAAGA  
TATTCGCAGTGGCACAATAAACGATGAAGAGGTGACGGATCCATGCCTCAGAGAGAGCGTCATGAAGATA  
CTCCGCCCCAAAATTCAACTGGCTGACTTGATCCACGCCGAGTGCTCCAAAGAATCATGGCAAGGAATCA  
TCACTCGCCTGTGGCCCAACGCCAGATATTTGGACGTCATTGTTACAGGCGCCATGGCGCAATACATCGA  
GACGCTGGATTTTTTACAGCGGCGGCCCTTCTCAGGTTTGCACAATGTATGCCTCCTCGGAGTGTATTTT  
GGAATCAATCTCAAGCCTCTGTGCAAGTCGTCCGAGGTTTCTTACACGCTAATGCCCAACATGGCCTTTT  
TCGAGTTCCTTCCGGTCTACCGTAACAACGACGATGCAGCGCCCCGTACCCATGGCCACCGAGCAGCAAGA  
GCTTGTGCATCTAGCTGATGTGACAGTGGGACAAGAATATGAGCTTGTGATCACCACATATGCAGGACTA  
TACCGTTACAGAGTGGGAGACGTGCTACGGGTGACGGGGTTCTACAACGCGGCGCCGAGTTCAGTTTCG  
TGTGCAGGAAGAATGTAATGCTGAGCATCGACTCCGATAAAACCGACGAAGCAGAGCTGCACAGCGCAGT  
AAAGAATGCTGTTAAGCATCTGGAGCCCTTCGAGGCTAGCCTCGTGGAGCACACCAGCTACGCCGAAACG  
TCCACCATTCCGGTTCATTACGTTCTTTACTGGGAGCTGCGGAACTCCACGGTGCCTGCCTGCCCTCCG  
TTTTTGAAGATTGCTGCCTGACCATAGAAGAATCTCTCAACTCCGTCTACAGGCAGTGCAGAGTAGCAGA  
CAAAATCCATCGGCCCTTGGAGATTAAAGTAGTTGAAACGGGAACATTTCGACAAAATTGATGGACTATGCT  
ATCAGCCGAGGTTCCCTCCATCAATCAATACAAAAGCGCCACGATGCGTCAAGTTCGCTCCAATGGTGGATC  
TCCTAAAGTCCAGAGTTTCGGCAAGCTATTTTCAGCCCCAGGTGTCCCAAATGGACACCAGGACGGACCCA  
GTGGGGCGCCATTACTCGGTTAATTTAATAATAA

>PaGH3.17\_CDS

ATGGAGATGAATATTCGCTGCGCCAAAGACAAAGGCGAGGCGGCCCTGCAGCTTATCGAGAATTTGACTG  
CCAGGGCCGACGAGGTGCAGAAGCAAGTATTGTATGAGATCTTAAGGAGAAAACGCAGAGACCGAGTACCT  
GAACAAATTTCTCAACGGTTCGAATCGATAACAAATCGTTCAAATCAACGTACCCGTTGTAACTACGAG  
GATATCAAACCATACATCCAGCGGATAGCCAATGGAGACGCTTCTGCCATTATTTCTGCTGAACCCATAT  
CAGAGCTGCTGACAAGCTCTGGAACATCAGGCGGACAGCCTAAAATAATGCCTTCCATTCCCAGGAGCT  
TCACAGGAAAACCTTTCTTTACAATCTACTGATGCCAATAATGAACAAGTACAGGAAAACCTTTCTTTAC  
AATCTACTGATGCCAATAATGAACAAGTATGTTCCCTGGACTGGACAAAGGAAAAGGGATGTACCTCCAGT  
TTATAAAAACGGAGGTAACTACTCCTTCCGGACTAAAGGCGAGGCCGGTGTGACGAGCTACTACAAGAG  
TAGCAACTTCAGGGATCGACCATTTGATAAGTTAATGTGTATACGAGCCCGGACGAGACAATCCTTTGT  
CCCGACAGCAGACAAAGTATGTTTTGCCAATTACTGTGTGGATTATTACAAAGGGACGAAGTACTCAGAG  
TTGGGGCTGTTTTTGCCTCCGCATTTCTCAGGGCCATTAAGTTTTCTGGAGGAAAACCTGGGAAGAACCTTG  
CGACAACATACGCACAGGGCATCTGAGCGACTGGATCGACGATCCTCCATCCAGAATTGCTGTTATGAAG  
ATGCTCAGTCCTAACCCCCAACTCGCAGAAGAAAATCCATGGGGAAATGCAGCAAGAAATCGTGGCAAGGAA  
TAATTACCCGTCTGTGGAGAAAGACAATATACATAGATGTAATAGTCACTGGAACCATGGCACAGTATAT  
TCCAACCTTTGATTACTATGGTGGAGGGCTCCCTTTAGTATCTACCATGTACGCGTCTTCTGAGTGTTAT  
TTCGGAGTAAATCTGAAACCTTTGAAAGTCTTAGATTTGCAGTCCAACGGCACAGAAAATGGGAAAAAAA  
TAGAGGATGAATTAGTGGACCTGGTGGATGTGAAGGTTGGTCACTACTATGAACTTGTAGTGACAACTTA  
TGCTGGCTTATATCGATATAGGGTCGGTGACATTTCTCTTAGTGACAGGTTTTCTACAACAGAGCCCCTCAG  
TTTGAATTTGTTTACCGTAGAAACGTGGTTCTCAGTATTGACACAGACAAAACAAATGAAGAAGATTTGT  
TGAAGGCTGTCACTAAAGCCAAGAAATTGTTAGAGCCATTCAATGCCCTGTTATCGGAGTACACTAGCTA  
TGCTGATACATCTACACTACCCGGTCACTATGTTCTGTTCTGGGAACTGAATACCAGGGAAGAAATTTTG  
GATGCATCCGTATTGGAAAGCTGTTGCTCAACGATCGAGGAATCCTTGGATTCTATCTACAGAAGATGCA  
GAACCAAAGATAAGTCTATTGGCCCCTAGAGATAAGGCTAGTGAAACCTGGGACGTTTGATTTGTTGAT  
GGATTATTGTCTGAATCAAGGCTCTTCTTACAATCAGTACAAAACACCCAGATGTATCAAGTCTCTCCAT  
GTCTTAGGGCTTCTAAATTCAAAGTCACTGCCAATACTTCAGCAAACGTCTTCCGTCTTGGACACCAT  
ACAACCCTGGCAGCCTGAATCCAAATTCTCAGCTTTATTAA

>PaGH3.gII.8\_CDS

ATGAGTTCTTCTCTGGGAAACGAGGTTCGATGATCGAAACAAGAGAGCTCTGGAATTCATCGAGACCGTCA  
CCACAGACGCAGACGAGGTGCAGACTCAGGTCTCTCCTCAATCTTATCGAGAAATGCAGACACGGAATA  
CTTGAAGAGATACGGCCTCAATGGACGAACTGATAGAGCCACTTTCAAAAAGTGTCTGCCAGTAATCACT  
TATGATGATCTGAAGCCTGAAATACGTCGGATTGCTAGCGGAGACACTTCTCCAATCCTTTCTGCTCATC  
CAGTTTCCGAATTCTCACAAGCTCGGGAACCTCTGCTGGTGAACGGAAGCTGATGCCCACCATCCAGGA  
GGAAATTGGAGAGGAAAGCTCTTCTGTATAGTCTTCTCATGCCCGTCATGAATCAATACATGAAAAGGACTT  
GACGAGGGAAAGGGAATGTATTTCTTCTTCATAAAAATCGGAGGCAAAGACTCCAGGAGGGTTGCTCGCAC  
GTCCCCTCTGACGAGCTATTACAAGAGCGACTACTTCAAGGAGAGGCCCTTACGATCCCTACAATGTTTA  
CACTAGTCCTAATCAGACAGTCCTCTGTCAGGATGCCTACCAGAGCATGTACTCTCAACTGCTATGCGGT  
CTCCTTCAAATAACGAGGTTCTAAGAATGGGAGCCGTCTTCGCCTCTGGATTTCATCAGAGCTATACGCT  
TCCTAGAAGAGCACTGGAGACAATTTTGCCTGGACATAAAAACCGGCATTCTCAACAGAGAGGTGACGGA  
TCCATCAGTGAGGGAGCCGTCGGGGAGCTTCTGCACCCGAATCCAGAGTTGGCTGATTTTGTGAAAGG  
AAATGTTTCAGCCCAGTCCTGGCAAGGAATTATAACTCGCCTGTGGCCTAACACTAAGTATATCGATGTCA  
TCGTGACTGGTGAATGGCTCAATATATTCCTACTTTGGATTACTACAGCGGCGGGCTACCCCTGGTATG  
CACCATGTACGCTTCATCCGAATGCTACTTTGGACTTAATCTGAAGCCTCTCTGCAAGCCTTCAGAAGTG  
TCATACACTTTACTCCCAAACATGGCCTATTTTCGAGTTCCTTCCCGTTCACCGCAAACAAGAAGCAGCTG  
GTCTGACCATAGAATCGTCAACGATCCCCAAAACACTCGACGACAAAGAGCGAGAGGAATTGGTTGAGCT  
TGTGGACCTGAAACTTGGGCAAGAATACGAGCTCGTCGTCACCACATATGCTGGTTTGAATCGTTATAGA  
GTGGGGGATGTGCTACGCGTACTGGTTTTCCACAACGCTGCGCCTCAATTCCATTTTGTATGCAGACAGA  
ATGTTGTTCTGAGTATAGACTCAGACAAAACAGATGAAGTAGAGCTTCACAGTGCGGTAGAGAATTCTGT  
CAAGCATCTGGAAGCGTTCGACGCCCAATTGATCGAGTATAACAAGCTATGCCGACACAGGTACAATCCCT  
GGCCACTACGTGCTATACTGGGAACTTCGCTTCAACACCAAAGCAATTGAAGTTCCTTCTCAGTTTTTG  
AAGATTGCTGTCTCACCGCAGAAGAATCCCTGAATTCTGTCTATCGCCAAGGAAGAGCGTCCGATAAGTC  
CATCGGCCCTCTGGAATTAGGGTAGTTGAAGAGGGAACGTTCAACGAATTGATGGATTATGCTCTCAGT  
AGAGGGGCATCCATAAATCAATACAAAGCCCCCAGATGCATTAAATTCCTCCATCGTTGAGCTGCTAA  
ACTCCAGGGTTCGTGCATTCTACTTTCAGCCCGCAGCCTCCACAATGGGCTCCAGGATGCAGAAATGGGC  
ATAA

>PaGH3.grII.9\_CDS

ATGAGTTCTGCTATGGGAAACGGCGTCAGTGATCGAGACAAGAGAGCTCTGGATTTTCATCGAGAGCGTCA  
CCACAAACGCAGACGATGTGCAAATTCGTGTCTCTCCTCGATCTTATCGAGAAATGCGGACACCGAATA  
CCTCAAGAGATACGGCCTGAATGGACGAACTGATAGAGCCACTTTCAAAGAGTGTCTGCCAGTGATAACT  
TATGACGATCTCCAGCCTGATATACGTCGTATTGTTGGCAGAGACACTTCTCCCATCCTTTCTGCTCACC  
CAGTTTCTGAATTCCTCACTAGCTCGGGAACCTCGGCTGGTGAACGGAAGCTGATGCCACCATCCAGGA  
GGAATTGGAGAGGAAAGCTCTTCTGTATAGTCTTCTCATGCCCGTCATGAATCAATATATGCAAGGACTT  
GACAAGGGAAAGGGAATGTATTTCTTCTTCATAAAAATCGGAGGCAAAGACTCCCGGAGGGTTGCCCGCAC  
GTCCCGTCTTGACGAGCTATTATAAAAGCCCCCACTTCAGGGAGAGGCCCTACGATCCCTACAACGTTTA  
CACCAGTCTAACCAGACGGTCTCTGTCCGGATGCCTACCAGAGCATGTACTCTCAACTGCTATGCGGT  
CTACTCCAACATAATGAGGTGCTGAGGATGGGAGCCGTCTTCGCTTCTGGGTTTCATCAGAGCTATACGCT  
TCCTGGAAGAGCACTGGACACAATTTTGCCTGGACATAAGAACCGGCATTATCAACAGAGAGGTGACGGA  
TCCATTAGTGAGAGAGGGCCGTCGGGGAGCTTCTGCACCCGAATCCAGAGTTGGCCGATTTGGTTGAAAGG  
GAATGTTTCAGCCCCGTTCATGGCAAGGAATTATAGCTCGCCTCTGGTCTAACACTAAGTATATCGATGTCA  
TCGTCACTGGTGAATGGCTCAATATATTCCTACTTTGGATTACTACAGTGGCGGGCTACCACTGGTATG  
CACCATGTACGCTTCGTCCGAATGCTACTTTGGACTTAATCTGAAGCCTCTCTGCAAGCCTTTTGAAGTG  
TCATACACTTTACTCCCAAACATGGCCTATTTTGGAGTTCCTTCCCGTTCACCGCAAACAAGAAGAAGCTG  
GCGTGACTIONTCGAATCGCCAGGGACACTCGACGAGAAAGAGCGAGAGGAGTTGGTGGAACTTGCTGACGT  
GAACTTGGGCGAGAATACGAGCTTGTCTGTCACCACGTATGCCGGTTTTGAATCGTTATAGAGTCGGGGAT  
GTGCTGCGTGTGACTGGATTTTACAACGCTGCGCCACAATTCCATTTTCGTGTGTAGACAGAATGTTGTGC  
TCAGCATCGACTCCGACAAAACGGATGAAGCAGAGCTGCACAGCGCGGTAGAGAATTCTGCTAAGCATCT  
GGTGCCATTCCACGCCCAATTGGTTCGAGTATAAAGCTATGCCGACACAGCGACAATACCTGGTCACTAC  
GTGCTGTATTGGGAACTTCGCTTCGACACCAAAGCAGTTGCATTTCTTCTTCAGTCTTTGAAGATTGTT  
GTCTCACTATAGAAGAATCCCTGAATTCTGTTTATCGCCAAGGAAGAGCGTCCGACAGGTCCATCGGCCC  
CCTGGAATTAGGGTAGTTGAAGAGGGAACGTTTCGACCAATTGATGGATTATGCTCTCAGTAGAGGGGCA  
TCCATAAATCAATACAAAGCTCCCAGATGCGTTAAATTCACACCCATTGTTGAGCTGCTAAACTCCAGGG  
TCGTGCATTCTACTTTCAGCACCCAGCCACCACAATGGGCTCCCGGATGCAGAGAATGGGCGTAA

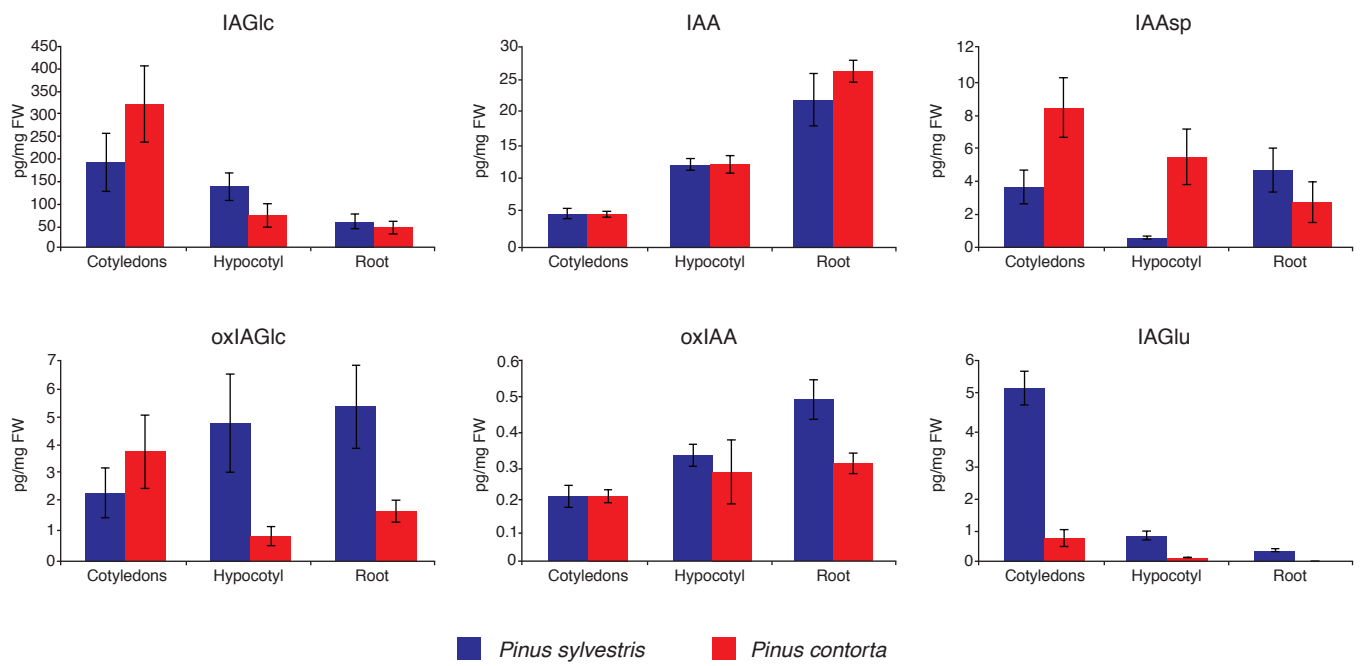

**Figure S2**

**Levels of IAA metabolites in different organs of *Pinus sylvestris* and *Pinus contorta* seedlings.**

IAA and IAA metabolites oxIAA, oxIAGlc, IAGlc, IAAsp and IAGlu were quantified in cotyledons, hypocotyl and root from 2-week-old pine seedlings. The level of IAGlu in *P. contorta* root was under the detection limit of the used LC-MS/MS method. Blue indicates *P. sylvestris* and red indicates *P. contorta*. The concentrations of all metabolites are in picograms per milligram fresh weight (FW). Error bar indicates  $\pm$ SD (n = 4).

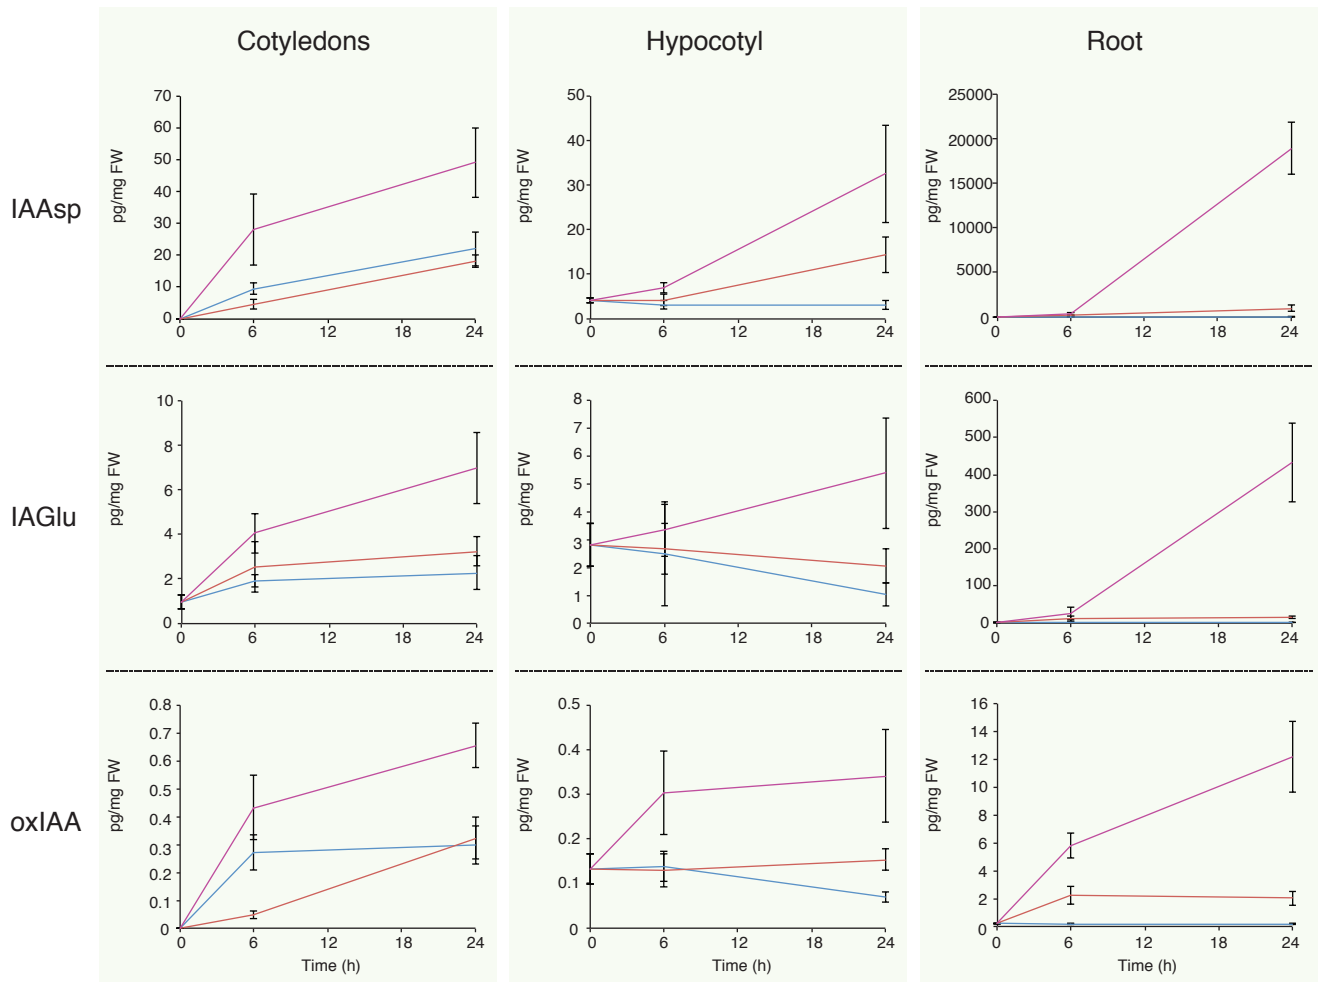

**Figure S3**

**Concentrations of IAA metabolites in different organs of *Picea abies* after feeding with unlabeled IAA.**

Two-week-old spruce seedlings were incubated with 1 (red line), 10 μM (pink line) or without (blue line) unlabeled IAA and the levels of IAA and IAA metabolites IAAsp, IAGlu and oxIAA were quantified in cotyledons, hypocotyl and root after different incubation times. The concentrations of all metabolites are in picograms per milligram fresh weight (FW). Error bars indicate ±SD (n = 4).



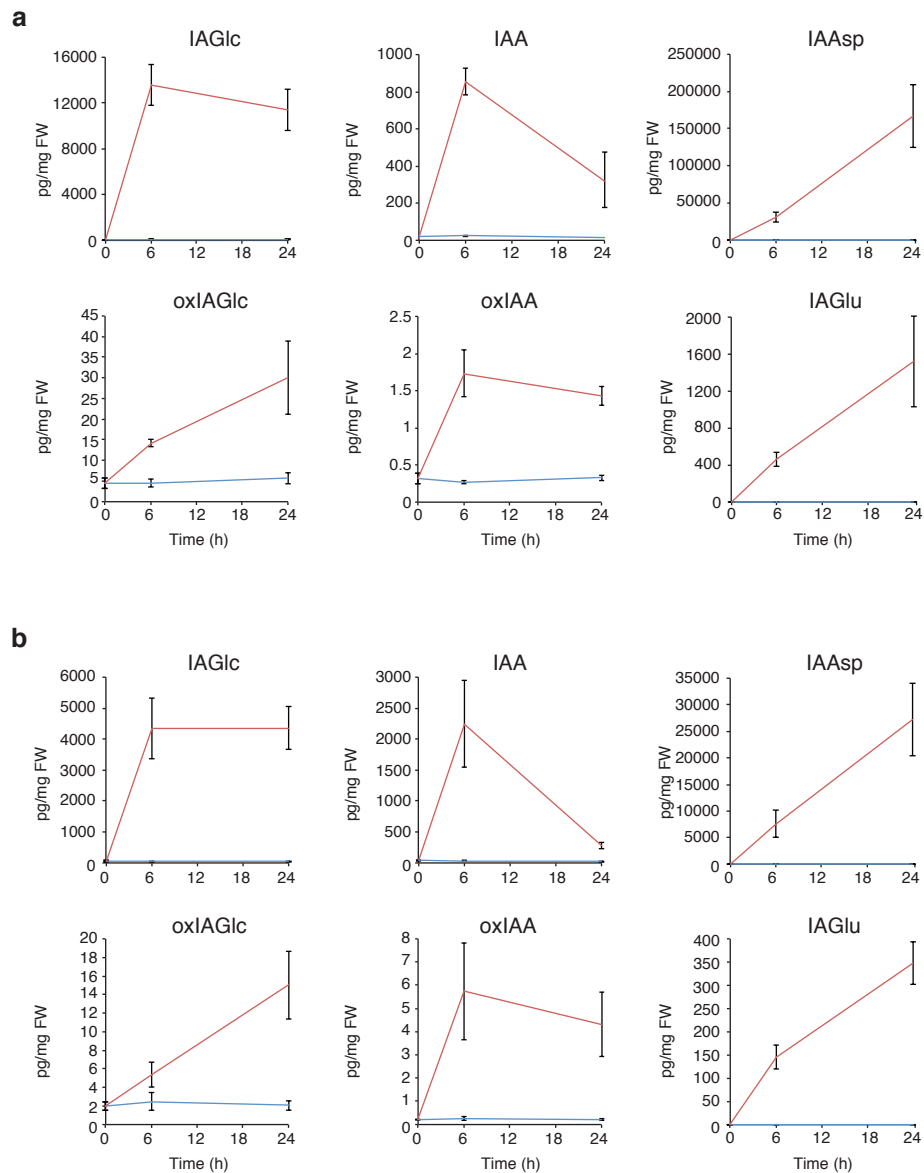

**Figure S4**

**Concentrations of IAA metabolites in *Pinus sylvestris* and *Pinus contorta* roots after feeding with unlabeled IAA.**

Two-week-old pine seedlings were incubated with (red line) or without (blue line) 10  $\mu$ M unlabeled IAA and the levels of IAA and IAA metabolites oxIAA, oxIAGlc, IAGlc, IAAsp and IAGlu were quantified in roots after different incubation times. Panel **a** indicates *P. sylvestris* and panel **b** indicates *P. contorta*. The concentrations of all metabolites are in picograms per milligram fresh weight (FW). Error bars indicate  $\pm$ SD (n = 4).

|              |   |                                                              |
|--------------|---|--------------------------------------------------------------|
| AtGH3.1      | 1 | -----                                                        |
| AtGH3.2      | 1 | -----                                                        |
| AtGH3.3      | 1 | -----                                                        |
| AtGH3.4      | 1 | -----                                                        |
| AtGH3.5      | 1 | -----                                                        |
| AtGH3.6      | 1 | -----                                                        |
| PpinGH3.16   | 1 | -----                                                        |
| PaGH3.16     | 1 | -----                                                        |
| PaGH3.gII.1  | 1 | -----                                                        |
| PaGH3.gII.2  | 1 | -----                                                        |
| PaGH3.gII.3  | 1 | -----                                                        |
| PaGH3.gII.4  | 1 | -----                                                        |
| PaGH3.gII.5  | 1 | -----                                                        |
| PaGH3.gII.6  | 1 | -----                                                        |
| PaGH3.gII.7  | 1 | -----                                                        |
| PaGH3.gII.8  | 1 | -----                                                        |
| PaGH3.gII.9  | 1 | -----                                                        |
| PaGH3.gII.10 | 1 | -----                                                        |
| AtGH3.9      | 1 | -----                                                        |
| AtGH3.17     | 1 | -----                                                        |
| PaGH3.17     | 1 | -----                                                        |
| AtGH3.11     | 1 | -----                                                        |
| AtGH3.10     | 1 | -----                                                        |
| PaGH3.gI.1   | 1 | -----                                                        |
| PaGH3.gI.2   | 1 | MPGSIDSHEEVIREFEAMAQNAEEVIREFEAIAQNAERDNMKNRSEGGKRIEGEEGVKDE |

|              |    |                                                               |
|--------------|----|---------------------------------------------------------------|
| AtGH3.1      | 1  | -----MAV                                                      |
| AtGH3.2      | 1  | -----MAVD                                                     |
| AtGH3.3      | 1  | -----MTV                                                      |
| AtGH3.4      | 1  | -----MAVD                                                     |
| AtGH3.5      | 1  | -----MPEAP                                                    |
| AtGH3.6      | 1  | -----MPEAP                                                    |
| PpinGH3.16   | 1  | -----MPQAKREEG                                                |
| PaGH3.16     | 1  | -----MPQAKREES                                                |
| PaGH3.gII.1  | 1  | -----                                                         |
| PaGH3.gII.2  | 1  | -----                                                         |
| PaGH3.gII.3  | 1  | -----                                                         |
| PaGH3.gII.4  | 1  | -----                                                         |
| PaGH3.gII.5  | 1  | -----                                                         |
| PaGH3.gII.6  | 1  | -----                                                         |
| PaGH3.gII.7  | 1  | -----                                                         |
| PaGH3.gII.8  | 1  | -----                                                         |
| PaGH3.gII.9  | 1  | -----                                                         |
| PaGH3.gII.10 | 1  | -----                                                         |
| AtGH3.9      | 1  | -----                                                         |
| AtGH3.17     | 1  | -----                                                         |
| PaGH3.17     | 1  | -----                                                         |
| AtGH3.11     | 1  | -----MDALK                                                    |
| AtGH3.10     | 1  | -----                                                         |
| PaGH3.gI.1   | 1  | -----                                                         |
| PaGH3.gI.2   | 61 | SRRSNMTGSVDSHEEVIRELEAMTLKAERVQRETLEDNMNKGSEGGKMIIEGKEGALLNRV |

AtGH3.1 4 DSNLSSPLGPPACEKDAKALRFIEEMTRNADTVQENLLAEILARNADTEYLRRFNLG---  
 AtGH3.2 5 SPLQSRMVSATTSEKDVKALKFIEEMTRNPDSVQEKVLGEILTRNSNTEYLKRFDLG---  
 AtGH3.3 4 DSALRSPMMHSPSTKDVKALRFIEEMTRNVDFVQKKVIREILSRNSDTEYLKRFGLK---  
 AtGH3.4 5 SLQSGMASPTTSETSEVKALEFIEEITRNPDVQEKVLGEILSRNSNTEYLKRFDLN---  
 AtGH3.5 6 KKESEVFDLTLDOKKNKQKLFIEELTNSADQVQVLEEILTRNADVEYLRRHDLN---  
 AtGH3.6 6 KIAALEVSDSESLAEKKNKQLQFIEDVTNADDVORVLEEILSRNADVEYLRRHGLE---  
 PpinGH3.16 10 IESVQESIIATTEERNKALDFIEHATHAAEVQAEVLEILTRNAYTEYLERYQLT---  
 PaGH3.16 10 MESVQECISIIATTEERNKALDFIEHATHAAEVQAEVLEILTRNAYTEYLERYQLT---  
 PaGH3.gII.1 1 -----MSSVEKRASNRKKALEFIENITRINADEVQAQVLAAILTRNADTEYLKRYGLS---  
 PaGH3.gII.2 1 -----  
 PaGH3.gII.3 1 -----  
 PaGH3.gII.4 1 MPEAPMRMGNRANDRDKRALDFIENVTTNADDEQVRVLSAILTRNANTEYLKRYGLS---  
 PaGH3.gII.5 1 -----  
 PaGH3.gII.6 1 -----  
 PaGH3.gII.7 1 -----INGANDRHKAALFEIENVTRNADEVQARVLCSSILTRNGDTEYLKRHGLS---  
 PaGH3.gII.8 1 ---MSSSLGNEVDDRNRKRALFEIETVTTDADEVQTVLSSILSRNADTEYLKRYGLN---  
 PaGH3.gII.9 1 ---MSSAMGNGVSDRDKRALDFIESVTTNADDVQIRVLSILSRNADTEYLKRYGLN---  
 PaGH3.gII.10 1 -----  
 AtGH3.9 1 -----MDVMKLDHDSVLEKELERITSKAAEVQDNILRGILERNKDTTEYLSKY-MN---  
 AtGH3.17 1 -----MIPSYDPNDTEAGLKLLEDLTTNAEAIQQQVLHQILSONSGTQYLRALF-LD---  
 PaGH3.17 1 ----MEMNIRCAKDKGEAALQLIENLTARADEVQKQVLYEILRNAAETEYLNKFLN---  
 AtGH3.11 6 HKRAFVKMLEKVFETFDMNRVIDEFDEMTRNAHQVQKQTLKEILLKNQSAIYLLQNCGLN---  
 AtGH3.10 1 -----METVEAGHDDVIGWFEHVSSENACKVQSETLRRILELNSGVEYLRKWLGTVDV  
 PaGH3.gI.1 1 -----  
 PaGH3.gI.2 121 KDESRRSDMPGSVDSHEEVIREFEAMTHNAERVQRETLEAILQRNSGTEYLKKGWVGF---

AtGH3.1 61 GATDRDT---FKTKIPVITYEDLQPEIQRIADGDRSPILSAHPISEFLTSSGTSAGERK  
 AtGH3.2 62 GVVDR--KT--FKSKVPVITYEDLKPEIQRISNGDCSPILSSHPITEFLTSSGTSAGERK  
 AtGH3.3 61 GFTDR--KT--FKTKIPVITYDDLKPEIQRIANGDRSMILSSYPITEFLTSSGTSAGERK  
 AtGH3.4 62 GAVDR--KS--FKSKVPVITYEDLKTDIQRIANGDRSPILSSHPITEFLTSSGTSAGERK  
 AtGH3.5 63 GRTDR--ET--FKNIMPVITYEDIPEINRIANGDKSPILSSKPISEFLTSSGTSAGERK  
 AtGH3.6 63 GRTDR--ET--FKHIMPVITYEDIQPEINRIANGDKSQVLCNSPISEFLTSSGTSAGERK  
 PpinGH3.16 67 GRTDR--KS--FKERLPVITYEDLQPEILRIANGDMSPILSAHPISEFLTSSGTSAGERK  
 PaGH3.16 67 GRTDR--ES--FKECFPVITYEDLQPEILRIANGDTSPILSAHPISEFLTSSGTSAGERK  
 PaGH3.gII.1 54 GQTDRT--ET--FKKCLPVITYDDLKPEIHRIANGDTSPILSAHPISEFLSTGTSAGQPK  
 PaGH3.gII.2 1 -----  
 PaGH3.gII.3 1 -----  
 PaGH3.gII.4 58 GRTDRST---FKKCLPVITYDDLKSEIHRIANGDTSPILSGHPVSEFLTSSGTSAGERK  
 PaGH3.gII.5 1 -----  
 PaGH3.gII.6 1 -----  
 PaGH3.gII.7 51 GRTNR--ST--FKKCLPVITYDDLKPEIRRIANGDTSPILSAHPVSEFLTSSGTSAGERK  
 PaGH3.gII.8 55 GRTDR--AT--FKKCLPVITYDDLKPEIRRIASGDTSPILSAHPVSEFLTSSGTSAGERK  
 PaGH3.gII.9 55 GRTDR--AT--FKECLPVITYDDLQPDIRRVGRDTSPILSAHPVSEFLTSSGTSAGERK  
 PaGH3.gII.10 1 -----  
 AtGH3.9 49 GSKDVLE---FKRAVPITTYKDIYPYIQRIANGEDSSLITGHSTIEILCSSGTSAGEPK  
 AtGH3.17 51 GEADKNQQS--FKNKVPVNYDDVKPFIQRIADGESSDIVSAQPITELLTSSGTSAGKPK  
 PaGH3.17 53 GRIDN--KS--FKINVPVNYEDIKPYIQRIANGDASAIISAEPISELLTSSGTSAGQPK  
 AtGH3.11 63 GNATDPEEA--FKSMVPLVTDVELEPYIKRMVDGDTSPILTGHVPVPAISLSSGTSAGRPK  
 AtGH3.10 53 EKMDDYTLETLETSLVPIVSHADLPYIQRIADGETSPILLTQEPITVLSLSSGTEGRQK  
 PaGH3.gI.1 1 -----  
 PaGH3.gI.2 178 QGSTDPDPLQHFKSCVPVVCYPDLAPYMQRIADGDTSPILTADPITAFSLTAGTGDGNQK

AtGH3.1 117 LMPTI**KEELD**-----RRQLLYS**LLMPVMNL**-YVPGLDKGKGM**YFLFVKS**  
 AtGH3.2 118 LMPTI**EDLD**-----RRQLLYS**LLMPVMNL**-YVPGLDKGKGL**YFLFVKS**  
 AtGH3.3 117 LMPTI**EDMD**-----RRQLLYS**LLMPVMNL**-YVPGLDKGKAL**YFLFVKT**  
 AtGH3.4 118 LMPTI**EDIN**-----RRQLLGN**LLMPVMNL**-YVPGLDKGKGL**YFLFVKS**  
 AtGH3.5 119 LMPTI**EEELD**-----RRSLLYS**LLMPVMSQ**-FVPGL**ENKGM**YFLFIKS  
 AtGH3.6 119 LMPTI**EEELD**-----RRSLLYS**LLMPVMDQ**-FVPGLDKGKGM**YFLFIKS**  
 PpinGH3.16 123 IMPTI**HEELK**-----RR**TLLYS**LLMPVMNQ-YMKGLDKGKGM**YFLFVKS**  
 PaGH3.16 123 IMPTI**HEELE**-----RR**TLLYS**LLMPVMNQ-YMEGLDKGKGM**YFLFIKS**  
 PaGH3.gII.1 110 LVPTI**EDME**-----RR**ALLIS**LVMPIMSQ-YMEGLDKGKGM**YFLFINS**  
 PaGH3.gII.2 1 -----  
 PaGH3.gII.3 1 -----  
 PaGH3.gII.4 114 LMPTI**QEELE**-----R**KTLLYS**LLMPVMNQ-----  
 PaGH3.gII.5 1 -----  
 PaGH3.gII.6 1 -----  
 PaGH3.gII.7 107 LMPTI**QEEWE**-----R**RNLLYK**LLMPVMNQ-YVQGLDKGKGM**YFYFIKS**  
 PaGH3.gII.8 111 LMPTI**QEELE**-----R**KALLY**SLLMPVMNQ-YMKGLDEGKGM**YFFFIKS**  
 PaGH3.gII.9 111 LMPTI**QEELE**-----R**KALLY**SLLMPVMNQ-YMQGLDKGKGM**YFFFIKS**  
 PaGH3.gII.10 1 -----  
 AtGH3.9 105 LMPTI**PEDLD**-----R**RTFLYNLI**PIV**NK**-YITGLDKGKAM**YLN**FVKA  
 AtGH3.17 109 LM**PS**T**A**E**E**L**E**-----R**K**T**FFYS**M**L**V**P**I**M**N**K**-YVDGLDEGKGM**YLL**FIKP  
 PaGH3.17 109 IM**PS**I**P**E**E**L**H**R**K**T**F**L**Y**N**L**L**M**P**I**M**N**K**Y**R**K**T**F**L**Y**N**L**L**M**P**I**M**N**K**Y**-YVPGLDKGKGM**Y**LQFIKT  
 AtGH3.11 121 F**I**P**F**T**D**E**L**M**E**-----N**T**L**Q**L**F**R**T**A**F**A**F**R**N**R-D**F**P**I**D**D**N**G**K**A**L**Q**F**I**F**S**S**K**  
 AtGH3.10 113 Y**V**P**F**T**R**H**S**A**Q**-----T**T**L**Q**I**F**R**L**S**A**A**Y**R**S**R-F**Y**P**I**R**E**G**G**R**I**L**E**F**I**Y**A**G**K**  
 PaGH3.gI.1 1 -----L**F**P**I**K**P**G**G**R**V**L**E**F**V**Y**G**S**K**  
 PaGH3.gI.2 238 L**V**P**F**N**D**S**V**I**A**-----S**K**L**Q**Y**R**I**T**N**A**Y**T**A**R**Q**F**P**P**P**Q**S**Q**S**R**F**L**Q**F**I**Y**G**S**R

AtGH3.1 160 E**T**K**T**P**G**G**L**P**A**R**P**V**L**T**S**Y**Y**K**S**E**H**F**R**S**R**--P**Y**D**P**Y**N**V**Y**T**S**P**N**E**A**I**L**C**P**D**S**F**Q**S**M**Y**T**Q**M**L**C**G**L**  
 AtGH3.2 161 E**S**K**T**S**G**G**L**P**A**R**P**V**L**T**S**Y**Y**K**S**D**H**F**K**R**R**--P**Y**D**P**Y**N**V**Y**T**S**P**N**E**A**I**L**C**S**D**S**S**Q**S**M**Y**A**Q**M**L**C**G**L**  
 AtGH3.3 160 E**S**K**T**P**G**G**L**P**A**R**P**V**L**T**S**Y**Y**K**S**E**Q**F**K**R**R**--P**N**D**P**Y**N**V**Y**T**S**P**N**E**A**I**L**C**P**D**S**S**Q**S**M**Y**T**Q**M**L**C**G**L**  
 AtGH3.4 161 E**S**T**T**S**G**G**L**P**A**R**P**A**L**T**S**Y**Y**K**S**D**Y**F**R**T**S**---D**S**D**S**V**Y**T**S**P**K**E**A**I**L**C**D**S**S**Q**S**M**Y**T**Q**M**L**C**G**L  
 AtGH3.5 162 E**S**K**T**P**G**G**L**P**A**R**P**V**L**T**S**Y**Y**K**S**S**H**F**K**E**R**--P**Y**D**P**Y**T**N**Y**T**S**P**N**E**T**I**L**C**S**D**S**Y**Q**S**M**Y**S**Q**M**L**C**G**L**  
 AtGH3.6 162 E**S**K**T**P**G**G**L**P**A**R**P**V**L**T**S**Y**Y**K**S**S**H**F**K**N**R**--P**Y**D**P**Y**T**N**Y**T**S**P**N**Q**T**I**L**C**S**D**S**Y**Q**S**M**Y**S**Q**M**L**C**G**L**  
 PpinGH3.16 166 E**T**R**T**P**G**G**L**L**A**R**P**V**L**T**S**Y**Y**K**S**Q**D**F**I**E**R**--P**Y**D**P**Y**N**V**Y**T**S**P**M**E**A**I**L**C**S**D**S**Y**Q**S**M**Y**C**Q**L**L**C**G**L**  
 PaGH3.16 166 E**T**R**T**P**G**G**L**L**A**R**P**V**L**T**S**Y**Y**K**S**Q**H**F**R**E**R**--P**Y**D**P**Y**N**V**Y**T**S**P**I**E**A**I**L**S**A**D**S**Y**Q**S**M**Y**C**Q**L**L**C**G**L**  
 PaGH3.gII.1 153 E**S**K**T**P**G**G**L**L**A**R**Y**S**S**T**R**W**Y**K**S**R**F**L**K**D**K**P**L**P**Y**D**P**Y**N**V**Y**T**S**P**I**E**T**I**L**C**P**D**A**Y**Q**S**M**Y**C**Q**L**L**C**G**L**  
 PaGH3.gII.2 1 -----  
 PaGH3.gII.3 1 -----  
 PaGH3.gII.4 1 -----  
 PaGH3.gII.5 1 -----M**C**D-----  
 PaGH3.gII.6 1 -----  
 PaGH3.gII.7 150 E**A**K**T**P**G**G**L**L**A**R**P**V**L**T**S**Y**Y**K**S**S**H**Y**F**R**E**R--P**Y**D**P**Y**N**V**C**T**S**P**I**Q**T**I**L**C**P**D**A**Y**Q**S**M**Y**S**Q**L**L**C**G**L**  
 PaGH3.gII.8 154 E**A**K**T**P**G**G**L**L**A**R**P**V**L**T**S**Y**Y**K**S**D**Y**F**K**E**R**--P**Y**D**P**Y**N**V**Y**T**S**P**N**Q**T**V**L**C**Q**D**A**Y**Q**S**M**Y**S**Q**L**L**C**G**L**  
 PaGH3.gII.9 154 E**A**K**T**P**G**G**L**P**A**R**P**V**L**T**S**Y**Y**K**S**P**H**F**R**E**R**--P**Y**D**P**Y**N**V**Y**T**S**P**N**Q**T**V**L**C**P**D**A**Y**Q**S**M**Y**S**Q**L**L**C**G**L**  
 PaGH3.gII.10 1 -----  
 AtGH3.9 148 E**T**S**T**P**C**G**L**P**I**R**A**V**L**T**S**Y**Y**K**S**K**H**F**Q**C**R**--P**Y**D**P**F**N**D**L**T**S**P**I**Q**T**I**L**C**E**D**S**N**Q**S**M**Y**C**Q**L**L**A**G**L**  
 AtGH3.17 152 E**I**K**T**P**S**G**L**M**A**R**P**V**L**T**S**Y**Y**K**S**Q**H**F**R**N**R**--P**F**N**K**Y**N**V**Y**T**S**P**D**Q**T**I**L**C**Q**D**S**K**Q**S**M**Y**C**Q**L**L**C**G**L**  
 PaGH3.17 168 E**V**T**T**P**S**G**L**K**A**R**P**V**L**T**S**Y**Y**K**S**S**N**F**R**D**R**--P**F**D**K**F**N**V**Y**T**S**P**D**E**T**I**L**C**P**D**S**R**Q**S**M**F**C**Q**L**L**C**G**L**  
 AtGH3.11 164 Q**Y**I**S**T**G**G**V**P**V**G**T**A**T**T**N**V**Y**R**N**P**N**F**K**A**G**--M**K**S**I**T**S**P**S**C**S**P**D**E**V**I**F**S**P**D**V**H**Q**A**L**Y**C**H**L**L**S**G**I**  
 AtGH3.10 156 E**F**K**T**L**G**G**L**T**V**G**T**A**T**H**Y**A**S**E**E**F**K**T**K**--Q**E**T**T**K**S**F**T**C**S**P**Q**E**V**I**S**G**G**D**F**G**Q**C**T**Y**C**H**L**L**L**G**L**  
 PaGH3.gI.1 19 E**S**S**T**K**G**G**L**V**A**S**T**A**T**T**N**I**Y**R**S**E**S**F**K**I**Y**--K**K**N**I**Q**I**L**G**C**S**P**D**E**V**I**F**G**F**D**S**R**Q**S**M**Y**C**H**I**L**C**G**L**  
 PaGH3.gI.2 282 Q**F**L**T**K**G**G**L**E**A**S**N**A**S**G**L**G**L**R**S**K**G**F**K**K**Y**--K**E**S**N**Q**W**L**A**C**S**P**E**E**V**V**F**G**F**N**Y**E**Q**S**L**Y**C**H**L**L**C**G**L**

AtGH3.1 218 IDRLSVLRVGVAVFASGLLRRAIRFLQLHWSRFAHDIELGCLDS-EITDPSIRQCMG-ILK  
 AtGH3.2 219 IMRHEVLRIGAVFASGLLRRAISFLQNNWKEKARDISTGTLSS-RIFDPAIKNRMSKILTK  
 AtGH3.3 218 IMRHEVLRIGAVFASGLLRRAIGFLQTNWKEKARDISTGTLSS-RISDPAIKESMSKILTK  
 AtGH3.4 217 IMRHEVLRIGAVFASGLLRRAISFLQNNWKEKARDISTGTLSS-KIFDHAIAKTRMSNILNK  
 AtGH3.5 220 CQHQEVLRVGVAVFASGFIRAIKFLFKHWIELVRDIRTGTLS-LITDPSVREAVAK-ILK  
 AtGH3.6 220 CQHKEVLRVGVAVFASGFIRAIKFLFKHWIELVRDIRTGTLS-LITDPSVREAVAK-ILK  
 PpinGH3.16 224 AQNHEVLRVGVAVFASGLLRRAIRFLEEHWQSLCQDIRSGTVNDEEVTDPCLRESVMK-LLH  
 PaGH3.16 224 AQNHEVLRVGVAVFASGLLRRAIRFLEEHWQSLCQDIRSGTINDEEVTDPCLRESVMK-ILR  
 PaGH3.gII.1 213 IQNYEVLRMGAVFASGFIRAIKFLFKHWIELVRDIRTGTLS-LITDPSVREAVAK-ILK  
 PaGH3.gII.2 1 -----  
 PaGH3.gII.3 1 -----  
 PaGH3.gII.4 -----  
 PaGH3.gII.5 4 -----  
 PaGH3.gII.6 1 -----  
 PaGH3.gII.7 208 IQNNE-----  
 PaGH3.gII.8 212 IQNNEVLRMGAIVFASGFIRAIKFLFKHWIELVRDIRTGTLS-LITDPSVREAVAK-LLH  
 PaGH3.gII.9 212 IQNNEVLRMGAIVFASGFIRAIKFLFKHWIELVRDIRTGTLS-LITDPSVREAVAK-LLH  
 PaGH3.gII.10 1 -----  
 AtGH3.9 206 IHRHKVLRVGVAVFASAFIRRAISYLEKKWSQLCEDIRTGSLNP-MITDPPGCOMAMSCLLMS  
 AtGH3.17 210 VQRSHVLRVGVAVFASAFIRRAIKFLFKHWIELVRDIRTGTLS-LITDPSVREAVAK-LLH  
 PaGH3.17 226 IQRDEVLRVGVAVFASAFIRRAIKFLFKHWIELVRDIRTGTLS-LITDPSVREAVAK-LLH  
 AtGH3.11 222 LFRDQVQYVFAVFAHGLVHAFRTFEQVWEIIVTDIKDGVLSN-RITVPSVRTAMSK-LLT  
 AtGH3.10 214 HYSQVEFVSAFYSYTIIVQAFSFEIIRREICADIKEGNLS-RITLPMRKAVALA-LIR  
 PaGH3.gI.1 77 LYSNEVQFMSSTFSYSIVFAFRTFEGVWQQLCTDIKEGTLNK-EITVPSMRASVSK-LLK  
 PaGH3.gI.2 340 LYSNEVQFMSSTFSYSIVFAFRTFEGVWQQLCTDIKEGTLNK-EITVPSMRASVSK-LLK

AtGH3.1 276 PDPVLAELFIRRECKSD--N--WEKIITRIWPNTKYLDVIVTGAMAQYIPTLEYYS-GGLP  
 AtGH3.2 278 PDQELAELFVGVCSQE--N--WEGIIITKIWPNTKYLDVIVTGAMAQYIPTLEYYS-GGLP  
 AtGH3.3 277 PDQELADFITSVCGQD--N--WEGIIITKIWPNTKYLDVIVTGAMAQYIPMLEYYS-GGLP  
 AtGH3.4 276 PDQELAELFLIGVCSQE--N--WEGIIITKIWPNTKYLDVIVTGAMAQYIPMLEYYS-GGLP  
 AtGH3.5 278 PSPKLADFVEFECKKS--S--WQGIITRLWPNTKYVDVIVTGTMSQYIPTLDYYS-NGLP  
 AtGH3.6 278 PDPKLADFVESECRKT--S--WQGIITRLWPNTKYVDVIVTGTMSQYIPTLDYYS-NGLP  
 PpinGH3.16 283 PNTQLADLIRTECSKE--S--WQGIITRLWPNTKYVDVIVTGTMSQYIPTLDYYS-NGLP  
 PaGH3.16 283 PKIQLADLIRTECSKE--S--WQGIITRLWPNTKYVDVIVTGTMSQYIPTLDYYS-NGLP  
 PaGH3.gII.1 272 PNPELAELIQRNCSAP--S--WQGIITRLWPNTKYIKTVVTGAMAQYIPTLDYYS-GGLP  
 PaGH3.gII.2 1 -----  
 PaGH3.gII.3 1 -----  
 PaGH3.gII.4 -----  
 PaGH3.gII.5 4 -----W-----FP  
 PaGH3.gII.6 1 -----  
 PaGH3.gII.7 213 -----YIPTLDYYS-AGLP  
 PaGH3.gII.8 270 PNPELADLIRRECKSAQ--S--WQGIITRLWPNTKYIDVIVTGAMAQYIPTLDYYS-GGLP  
 PaGH3.gII.9 270 PNPELADLIRRECKSAQ--S--WQGIITRLWPNTKYIDVIVTGAMAQYIPTLDYYS-GGLP  
 PaGH3.gII.10 1 -----  
 AtGH3.9 265 PNPELASEIEEICGRS--S--WKGIIICQLWPKAKFIEAVVTGSMQYIPALEFFSQGKIP  
 AtGH3.17 269 PNQELAELIESECAEK--S--WEGILRRIWPNTKYVEVIVTGTMSQYIPTLEFYS-GGLP  
 PaGH3.17 284 PNPQLAEIIEHGECSSK--S--WQGIITRLWRKTIYIDVIVTGTMSQYIPTLDYYS-GGLP  
 AtGH3.11 280 PNPELAELIRTKCMSL--S--NWYGLIPALFPNAKYVYVIMTGSMEPYVPKLRHYA-GDLP  
 AtGH3.10 272 PNPSLASHIEEICLELETNLGWFGLISKLWPKAKFISSIMTGSMLPYLNKLRHYA-GDLP  
 PaGH3.gI.1 135 PDPDLADATYKCKNI--G--NWHGVIPLWPKAKFISSIMTGSMEPYVPKLRHYA-GDLP  
 PaGH3.gI.2 398 PNPELAQSIIFETCEKLLTN--NWYGVVHKLWPKAKFISSIMTGSMEAYVKKLRHYA-GDLP

AtGH3.1 331 MACTMYASSECYFGINLNPMSKPSSEVSYTIMPNMAYFEFIPLG-----  
 AtGH3.2 333 MACTMYASSESYFGINLKPCKPSEVSYTIMPNMAYFEFLPHNHGDG-----GA  
 AtGH3.3 333 MACTMYASSESYFGINLKPCKPSEVSYTIMPNMAYFEFLPHHEVPTE-----  
 AtGH3.4 331 MASMITYASSESYFGINLNPCKPSEVSYTIFPNMAYFEFLPHNHGDG-----  
 AtGH3.5 333 IVCTMYASSECYFGVNLRLPCKPSEVSYTLIPSMAYFEFLPVHRNNG----VTNSINLPK  
 AtGH3.6 333 IVCTMYASSECYFGVNLRLPCKPSEVSYTLIPSNMAYFEFLPVHRNSG----VTSSISLPK  
 PpinGH3.16 338 QVCTMYASSECYFGINLKPCKPSEVSYTLIPNMAFFFEFLPVYRNKNEAG-----PV  
 PaGH3.16 338 QVCTMYASSECYFGINLKPCKSSEVSYTLMPNMAFFFEFLPVYRNNDDA-----AP  
 PaGH3.gII.1 327 IVCTMYSSSEGSFGINLNPCKPTEVSYTLIPNMAFFFEFLPVHRQEFG--LSIESPAIPK  
 PaGH3.gII.2 1 -----MAYFEFLPVHRKQEEAGATLES PAITK  
 PaGH3.gII.3 1 -----  
 PaGH3.gII.4 1 -----  
 PaGH3.gII.5 7 QRCA-----  
 PaGH3.gII.6 1 -----  
 PaGH3.gII.7 226 IVCTMYASSECYFGINLKPCKPSEVSYTLIPNMAFFFEFLPVHRKQLQLEAQE-----CP  
 PaGH3.gII.8 325 IVCTMYASSECYFGINLKPCKPSEVSYTLIPNMAFFFEFLPVHRKQEEAGLTIESSTIPK  
 PaGH3.gII.9 325 IVCTMYASSECYFGINLKPCKPFEVSYTLIPNMAFFFEFLPVHRKQEEAGVTLES---PG  
 PaGH3.gII.10 1 -----  
 AtGH3.9 321 IVCPMYASSETYFGVNVPELSPKPSDVVFTLLPNMCFEYFIPLGKNGTLSFD-----LD  
 AtGH3.17 324 IVSTMYASSECYFGINLNPCLDPADVSYTLIPNMAFFFEFLPVDDKSHEEIHFATHSNTDD  
 PaGH3.17 339 IVSTMYASSECYFGVNLKPL-----KVLDLQSNNGTE-----  
 AtGH3.11 336 IVSHDYGSSEGWIAANVTPRLSPPEATFAVIPNLGYFEFLPVSETGEG-----  
 AtGH3.10 331 IVSADYGSSESWIGVNVDPHLPEDVSVFAVIPTFSYFEFIPLYRRQNQSDICI-----  
 PaGH3.gI.1 191 LLTSEYCGATEGWIAANIDPTSSPENTIYTVVVDIGYFEFIPHLRHEGLKLDN-----SV  
 PaGH3.gI.2 456 ILPGGYAVSEGYLAVNIDS----ATTFTVVPSTAFFEFIPQDKEG-----

AtGH3.1 374 -----GTKAVELVDVNIKKEYELVVTTYAGLCRYRVGDIILRVTFGHNSAPQFHFVRRKN  
 AtGH3.2 382 AEASLDETSILVELANVEVGKEYELVITTYAGLYRYVGDILRVTFGHNSAPQFKFIRRN  
 AtGH3.3 381 -----KSELVELADVEVGKEYELVITTYAGLNRVYVGDILQVTFGFYNSAPQFKFVRRKN  
 AtGH3.4 379 ---GVEATSILVELADVEVGKEYELVITTYAGLYRYVGDILRVTFGHNSAPQFKFIRREN  
 AtGH3.5 389 ALTEKEQQELVDLVDVKLGOEYELVVTTYAGLCRYRVGDILRVTFGFKNKAPQFSFICRKN  
 AtGH3.6 389 ALTEKEQQELVDLVDVKLGOEYELVVTTYAGLYRYVGDVLSVAGFKNNAPQFSFICRKN  
 PpinGH3.16 391 TTATEQPAELVDLVDVKVGOEYELVITTYSGLYRYRVGDVLRVTFGHNAAPQFQFVCRKN  
 PaGH3.16 389 VTMATEQQELVDLADVTVGQYELVITTYAGLYRYVGDVLRVTFGFYNAAPQFQFVCRKN  
 PaGH3.gII.1 385 AVDEKEEKDLVLDLVDVKVGOEYELVVTTYAGLYRYVGDVLRVTFGHNAAPQFHFVCRQN  
 PaGH3.gII.2 28 TLDEKEREELVELVDVKLGOEYELVVTTYAGLNRVYVGDVLRVTFGFYNAAPQFHFVCRQN  
 PaGH3.gII.3 1 -----  
 PaGH3.gII.4 1 -----  
 PaGH3.gII.5 11 -----SIPCRQN  
 PaGH3.gII.6 1 -----MTGFHNNTAPQFHFVYRQN  
 PaGH3.gII.7 280 TLNEKDQDELVDLVDVKLGOEYELVITTYAGLYRYVGDVLRVTFGHNAAPQFHFVCRQN  
 PaGH3.gII.8 385 TLDDKEREELVELVDLKLGOEYELVVTTYAGLNRVYVGDVLRVTFGHNAAPQFHFVCRQN  
 PaGH3.gII.9 382 TLDEKEREELVELADVKLGOEYELVVTTYAGLNRVYVGDVLRVTFGFYNAAPQFHFVCRQN  
 PaGH3.gII.10 1 -----MHNS----NFVCRQN  
 AtGH3.9 374 DDEQVPCDKVLDLVDVNLKGRYELVVTTFAGLYRYRIGDVLQVAGFYNGAPQFRFICRRN  
 AtGH3.17 384 DDDALKEDLIVNLVNVVEVGQYEVITTFITGLYRYRVGDILKVTGFHNKAPQFRFVQRN  
 PaGH3.17 370 -NGKKIEDLVDLVDVKVGHYELVVTTYAGLYRYVGDILLVTFGFYNRAPQFEFVYRRN  
 AtGH3.11 384 -----EEKPVGLTQVKIGEEYEVVITNYAGLYRYRIGDVVKVIGFYNNTPQLKFI CRN  
 AtGH3.10 384 -DGDFVEDKPVPLSQVKLGOEYELVLTTFITGLYRYRIGDVVEVTSFHKGTPKLSFIYRRK  
 PaGH3.gI.1 246 ATADYIESLPVGLTFVKVGOEYEVVLTTFAGLYRYRIGDVVKVTGFYNSPQLSYICRKN  
 PaGH3.gI.2 498 -----QAEPIGLTFEVIIGKEYEVVITTFGG-----

AtGH3.1 428 VLLSIDSDKTDESELQKAVENAS--SILHEECGSRVAEYTSYADTSTIPGHYVLYWELLV  
 AtGH3.2 442 VLLSVEESDKTDEAEELQKAVENAS--RLFAEQ-GTRVIEYTSYAETKTIPGHYVIYWELLG  
 AtGH3.3 435 VLLSIESDKTDEAEELQSAVENAS--LLLGEQ-GTRVIEYTSYAETKTIPGHYVIYWELLV  
 AtGH3.4 436 VLLSIESDKTDEADLQKAVENAS--RLLAEQ-GTRVIEYTSYADTKTIPGHYVIYWELLS  
 AtGH3.5 449 VVLSIDSDKTDEVELQNAVKNV--THLVPF-DASLSEYTSYADTSSIPGHYVLFWELCL  
 AtGH3.6 449 VVLSIDSDKTDEVELQNAVKNV--THLVPF-DASLSEYTSYADTSSIPGHYVLFWELCL  
 PpinGH3.16 451 VMLSIDADKTDEAEELHNAVNAV--KHLEPL-EATLVEYTSYTDSTIPGHYVLYWELRT  
 PaGH3.16 449 VMLSIDSDKTDEAEELHSAVKNV--KHLEPF-EASLVEHTSYAETSTIPGHYVLYWELRN  
 PaGH3.gII.1 445 VVLSIHIIDKTDEAEELQSSVEKSI--KHLKPF-DITLMDYTSYADTSTIPGHYVLYWELRF  
 PaGH3.gII.2 88 VVLSIDADKTDEAEELHSAVENS--KHLEPF-DAQLIEYTSYADTSTIPGHYVLYWELRF  
 PaGH3.gII.3 1 -----MDEAEELHSAVENSA--KHLEPF-DAQLIEYTSYADTATIPGHYMLYWELHF  
 PaGH3.gII.4 -----  
 PaGH3.gII.5 18 VVLSIDSDKTDEAEERHSAVENSA--KHLEPF-DAQLIEYTRYSDTATIPGHYVLYWELHF  
 PaGH3.gII.6 19 VVLSIDSDKRDEVELHSAVENFA--KHLEPF-NAQLIEYTSYADIATIPGHYVLYWELRF  
 PaGH3.gII.7 340 VVLSIDSDKTDEAEELQSAVENS--KHLEPF-DSKLEIYTSYADTSTIPGHYVLYWELGS  
 PaGH3.gII.8 445 VVLSIDSDKTDEVELHSAVENS--KHLEAF-DAQLIEYTSYADTGTIPGHYVLYWELRF  
 PaGH3.gII.9 442 VVLSIDSDKTDEAEELHSAVENSA--KHLVPF-HAQLVEYTSYADTATIPGHYVLYWELRF  
 PaGH3.gII.10 12 VVLSIDSNKTDEVELHSAIENS--KHLEAF-DAQLIEYTSYAETGTIPGHYVLYWELRF  
 AtGH3.9 434 VVLSIDLDKTNEEDLHRSTLAK--KKLGS--NAFLAEYTSYADTSSVPGHYVLFWEIQG  
 AtGH3.17 444 VVLSIDIDKTSEEDLNAVTAQLNHLQHP--SLLLTEYTSYADTSSIPGHYVLFWELKP  
 PaGH3.17 429 VVLSIDIDKTNEEDLLKAVTKAK--KLELPE-NALLSEYTSYADTSTLPGHYVLFWELNT  
 AtGH3.11 438 LILSINIDKNTERDLQLSVESAA--KRLSEE-KIEVIDFSSYIDVSTDPGHYAFWEISG  
 AtGH3.10 443 LILINIDKNTKDLQRVVDKAS--QLLSRSTRAEVVDFTSHADVIARPGHYVIYWEIRG  
 PaGH3.gI.1 306 LILTVNIDKTEKDLQISVDKAT--ELLKEE-NVDLVDFTSYADLSTVPGHYVIFWELSD  
 PaGH3.gI.2 523 -----AFYINL--

AtGH3.1 486 RDGA---RQPSHETLTRCCLGMEESLNSVYRQSRVADNSVGPLEIRVVRNGTFEELMDYA  
 AtGH3.2 499 RDQSN--ALMSEEVMAKCCLEMEESLNSVYRQSRVADKSIGPLEIRVVRNGTFEELMDYA  
 AtGH3.3 492 KDQT---NPPNDEVMARCCLEMEESLNSVYRQSRVADKSIGPLEIRVVKNGTFEELMDYA  
 AtGH3.4 493 RDQSN--ALPSDEVMARCCLEMEESLNAVYRQSRVSDKSIGPLEIRVVQNGTFEELMDFS  
 AtGH3.5 506 DGNT---PIPP-SVFEDCCLAVEESFNTVYRQGRVSDKSIGPLEIKIVEPGTFDKLMDYA  
 AtGH3.6 506 NGNT---PIPP-SVFEDCCLTVEESLNSVYRQGRVSDKSIGPLEIKMVESGTFDKLMDYA  
 PpinGH3.16 508 SAL----PVPP-SVFEDCCLTVEESLNSVYRQCRVADKSIGPLEIKVVEMGTDFDKLMDYA  
 PaGH3.16 506 STV----PVPA-SVFEDCCLTVEESLNSVYRQCRVADKSIGPLEIKVVETGTDFDKLMDYA  
 PaGH3.gII.1 502 NNKEVAGAVPS-SVFEDCCLTVEESLNFVYRQGRGADKSIAPLEIRVVEEGTFEQLMDRA  
 PaGH3.gII.2 145 NTKSVADAVPS-SVFEDCCLTVEESLNSVYRQGRASDNSIA-----  
 PaGH3.gII.3 49 NTKTV--EVPF-SVFEDCCLTAEESLNSIYRQGRASDKSIGPMEIRVVEEGMFDELMDYA  
 PaGH3.gII.4 -----  
 PaGH3.gII.5 75 STKTV--EVPF-SVFEDCCLTAEESLNSIYRQGRASDKSIDPMEIRVVEEETFDELMDYA  
 PaGH3.gII.6 76 NTKAV--EVPS-LVFEDCCLTVEESLNFVYRQGRAFDKSIGPLEIRVVEEGTFDELMDYA  
 PaGH3.gII.7 397 KEVAL--TIPP-SVFEDCCLTVEESLNSVYRQGRVSDKSIGPLEIRVVEDGTDFDELMDYA  
 PaGH3.gII.8 502 NTKAI--EVPS-SVFEDCCLTAEESLNSVYRQGRASDKSIGPLEIRVVEEGTFNELMDYA  
 PaGH3.gII.9 499 DTKAV--AFPS-SVFEDCCLTVEESLNSVYRQGRASDRSIGPLEIRVVEEGTFDQLMDYA  
 PaGH3.gII.10 69 NTKAI--EVPS-SVFEDCCLTAEESLNSVYRQGRASDKSIGPLEIRVVEEGTFDELMDYA  
 AtGH3.9 490 HLEP-----KLMEECCVAEEELDYTYRQCRTKERSIGALEIRVVKPGTFEKLMDLI  
 AtGH3.17 503 RHSNDPPKDD-KTMECCSEVEDCLDYVYRRCRNRDKSIGPLEIRVVS LGTFDSLMDFC  
 PaGH3.17 486 RE-----EFLDASVLES CCSTIEESLDSIYRRCRTKDKSIGPLEIRLVKPGTFD LLMDYC  
 AtGH3.11 495 ETNE-----DVLQCCNCLDRAFIDAGYVSSRKCKTIGALELRVVAKGTFRKI QEHF  
 AtGH3.10 501 EADD-----KALEECCREMDTAFVDYGYVSSRRMNSIGPLELRVVERGTFGKVAERC  
 PaGH3.gI.1 363 SLNE-----GIVKRCCSIMDETFIDPGYVSSRKANTIGPLELRIVERGTFRKI IDYY  
 PaGH3.gI.2 -----

AtGH3.1 543 ISRGASINQYKVPRCVN-F-TPIVELLDSRVVSAHFSPSLPHWTPERRRR-----  
 AtGH3.2 557 ISRGASINQYKVPRCVS-F-TPIVELLDSRVVSAHFSPSLPHWSPERRR-----  
 AtGH3.3 549 ISRGASINQYKVPRCVS-F-TPIVELLDSRVVSTHFSPALPHWSPERRR-----  
 AtGH3.4 551 ISRGSINQYKVPRCVS-L-TPIMKLLDSRVVSAHFSPSLPHWSPERRH-----  
 AtGH3.5 562 ISLIGASINQYKTPRCVK-F-APIIELLNSRVVDSYFSPKCPKWVPGHKQWGSN-----  
 AtGH3.6 562 ISLIGASINQYKTPRCVK-F-APIIELLNSRVVDSYFSPKCPKWVPGHKQWGSN-----  
 PpinGH3.16 563 ISRGSINQYKAARCVK-F-APMVDILNSRVASASYFSPRCPKWTAGRTQWGALPR---  
 PaGH3.16 561 ISRGSINQYKAPRCVK-F-APMVDLLKSRVSAASYFSPRCPKWTPGRTQWGAITRLI-  
 PaGH3.gII.1 561 VCQKASINQYKAPRCVK-S-TSMVELLNSRVVHSYFSPRSPMWWVPGSAVSKLVGS---  
 PaGH3.gII.2 -----  
 PaGH3.gII.3 106 ISRGASINQYKAPRCIK-F-APIVELLNSRVVHSYFNPHNGLSDAEIGHNISLLK---  
 PaGH3.gII.4 -----  
 PaGH3.gII.5 132 ISRGASINQ-----  
 PaGH3.gII.6 133 E-----  
 PaGH3.gII.7 454 ISRGASINQYKVPRCVK-C-SPIVGLLNSRVVHSYFSPKCPQWAPGCRKWA-----  
 PaGH3.gII.8 559 ISRGASINQYKAPRCIK-F-TPIVELLNSRVVHSYFSPQPPQWAPGCRNWA-----  
 PaGH3.gII.9 556 ISRGASINQYKAPRCVK-F-TPIVELLNSRVVHSYFSTQPPQWAPGCREWA-----  
 PaGH3.gII.10 126 ISRGASINQYKAPRCIK-F-TPIVELLNSRVVHSYFSPQPPQWAPGCRNWA-----  
 AtGH3.9 542 ISQGGSEINQYKTPRCVK-SNSATFKLLNGHVMAFFSPRDPTWVP-----  
 AtGH3.17 562 VSQGSSEINQYKTPRCVK-S-GGALEILDNRVIGRFFSKRVPOWEPLGLDS-----  
 PaGH3.17 541 INQGSSEINQYKTPRCIK-S-LHVLGLLNSKVTAKYFSKRLPSWTPYNPGLNPNNSQLY  
 AtGH3.11 547 IGLGSAGQFKMPCVKPSNAKVLQILCENVVSSYFSTAF-----  
 AtGH3.10 553 VGECCGLNQFKTPRCT--TNSVMLDILNDSTIKRFRSSAYD-----  
 PaGH3.gI.1 415 TSHGCAVNQFKTPRCIS-TNQALLDILNKNTIQTCFSTLFS-----  
 PaGH3.gI.2 -----



**Fig. S5**

**Multiple sequence alignment of predicted amino acid sequences of PaGH3 and AtGH3 proteins.**

The multiple sequence alignment was obtained with MUSCLE software. Black shading indicates conserved residues, gray shading indicates residues with similar properties, - indicates a gap inserted to maximize the alignment. Letters with different colors indicate motif 1 (red), motif 2 (blue) and motif 3 (orange) involved in ATP/AMP binding that are conserved in the acyl-adenylate/thioester-forming enzyme superfamily (Staswick *et al.*, 2002). Bold letters represent conserved motif variation in members of Group I.

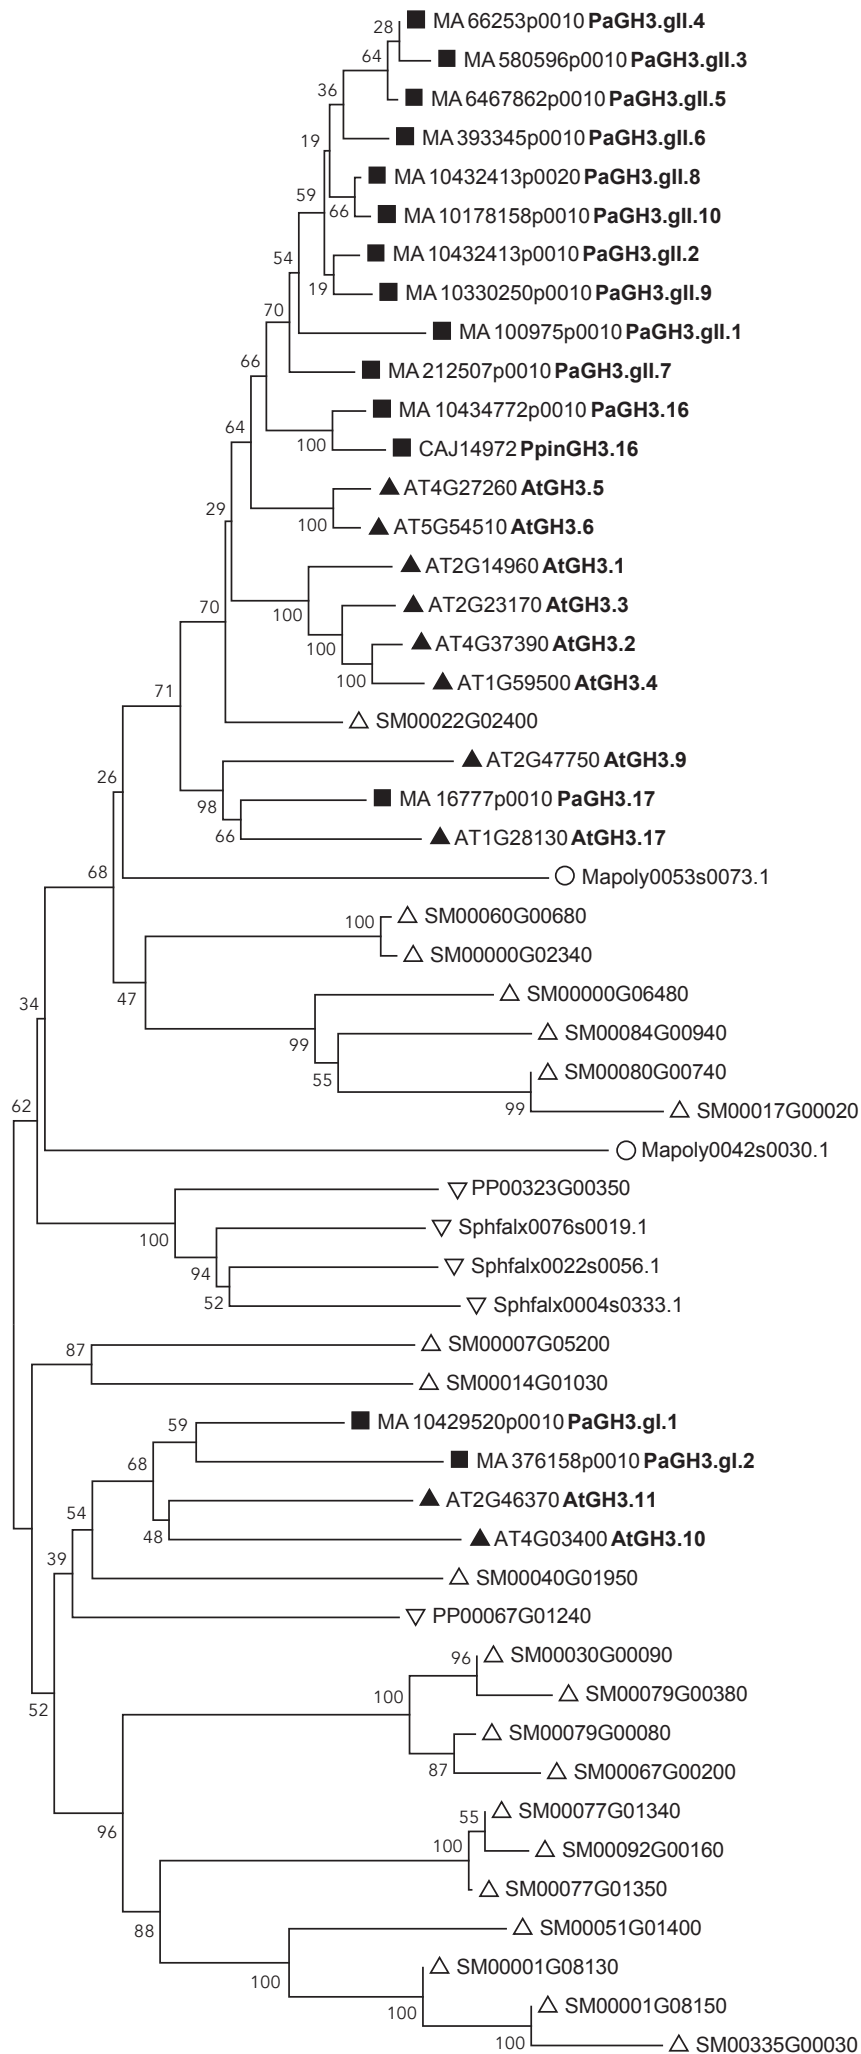

Group II

Group I

0.1

**Fig. S6**

**Phylogenetic relationships of GH3 proteins between *Picea abies* and other land plants.**

Predicted proteins sequences (both full-length and partial) from *P. abies* (Pa), *Pinus pinaster* (Ppin), Arabidopsis (AT), *Selaginella moellendorffii* (SM), *Physcomitrella patens* (PP), *Sphagnum fallax* (Sphfalx) and *Marchantia polymorpha* (Mapoly) were aligned using MUSCLE program. The phylogenetic tree was constructed using MEGA6 program and the Neighbor-Joining method with predicted GH3 proteins. Bootstrap support is indicated at each node. Closed triangle indicates angiosperms, closed square represents gymnosperms, up-pointing open triangle indicates lycophytes, down-pointing open triangle represents mosses and open circle indicates liverworts.

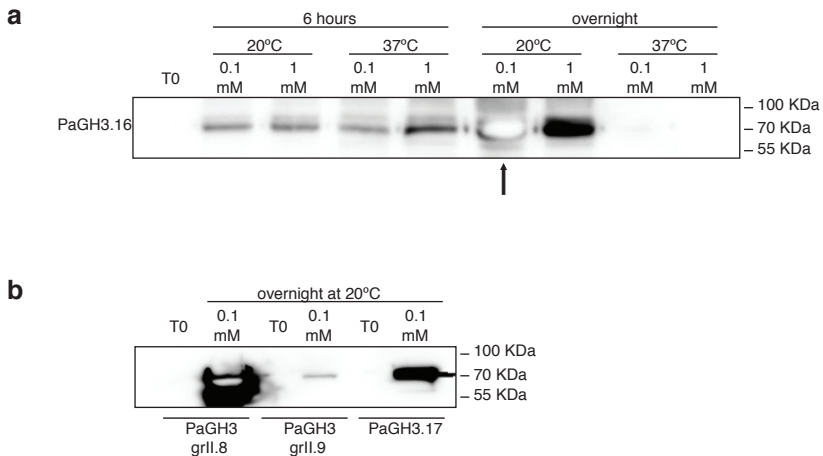

**Figure S7**

**Western blot analysis of IPTG-induced PaGH3.16, PaGH3.gIII.8, PaGH3.gIII.9 and PaGH3.17 recombinant proteins.**

**(a)** PaGH3.16 was used to test the optimal condition for expression of PaGH3 proteins. Bacterial cultures were treated with either 0.1 or 1 mM IPTG and incubated at 20°C or 37°C for 6 hours or overnight. Bacterial cultures that were sampled before the IPTG induction were used as non-induced control (at time 0, T0). The optimal condition was set to 0.1 mM IPTG overnight at 20°C (indicated by a black arrow) and used to induce the expression of other PaGH3 proteins. **(b)** PaGH3.gIII.8, PaGH3.gIII.9 and PaGH3.17 proteins expression. Calculated molecular weight (MW) of 6x His-recombinant proteins: 70.84 kDa (PaGH3.16),
